# Supplementary material
Source: PubMed Central journal article supplement (PMC4558368)
Supplement: NIHMS707653-supplement-1.pdf [file NIHMS707653-supplement-1.pdf]

Supplemental data for:

# The structural role of antibody N-glycosylation in receptor interactions

Ganesh P. Subedi and Adam W. Barb\*

Roy J. Carver Department of Biochemistry, Biophysics and Molecular Biology

Iowa State University, Ames, IA 50011

\*corresponding Author

email: [abarb@iastate.edu](mailto:abarb@iastate.edu)

address: 2214 Molecular Biology Building

Ames, IA, 50011

**Supplemental Table 1.** Alignment and quality-of-fit (Q) parameters from RDC fits. These data are from the RDC fits shown in Figure 2.

|       |                             | fit to PDB 1L6X |                            |                            |       |
|-------|-----------------------------|-----------------|----------------------------|----------------------------|-------|
|       |                             | n               | Da<br>( $\times 10^{-4}$ ) | Dr<br>( $\times 10^{-4}$ ) | Q     |
| Fc wt | C $\gamma$ 2 alone          | 10              | -6.8                       | -3.4                       | 0.188 |
|       | C $\gamma$ 3 alone          | 11              | 6.5                        | 4.0                        | 0.119 |
|       | C $\gamma$ 2 + C $\gamma$ 3 | 21              | -7.5                       | -3.5                       | 0.185 |
| T299A | C $\gamma$ 2 alone          | 10              | -8.8                       | -3.3                       | 0.245 |
|       | C $\gamma$ 3 alone          | 10              | 9.3                        | 5.9                        | 0.091 |
|       | C $\gamma$ 2 + C $\gamma$ 3 | 20              | -10.0                      | -4.5                       | 0.177 |

**Supplemental Table 2.** Relaxation parameters for IgG1 Fc wt and the T299A variant at 18.8 T. These data are presented in a plot format in Figure 4.

| Residue | IgG1 Fc wt               |                          | IgG1 Fc T299A            |                          |
|---------|--------------------------|--------------------------|--------------------------|--------------------------|
|         | $R_1$ (s <sup>-1</sup> ) | error (s <sup>-1</sup> ) | $R_1$ (s <sup>-1</sup> ) | error (s <sup>-1</sup> ) |
| 274     | 0.60                     | 0.03                     | 0.62                     | 0.02                     |
| 278     | 0.56                     | 0.03                     | 0.70                     | 0.09                     |
| 288     | 0.54                     | 0.03                     | 0.68                     | 0.04                     |
| 290     | 0.58                     | 0.03                     | 0.75                     | 0.04                     |
| 300     | 0.59                     | 0.05                     | 0.57                     | 0.02                     |
| 317     | 0.59                     | 0.04                     | 0.61                     | 0.01                     |
| 319     | 0.48                     | 0.04                     | 0.60                     | 0.02                     |
| 320     | 0.59                     | 0.04                     | 0.62                     | 0.02                     |
| 322     | 0.59                     | 0.04                     | 0.67                     | 0.03                     |
| 349     | 0.47                     | 0.02                     | 0.57                     | 0.03                     |
| 360     | 0.68                     | 0.06                     | 0.69                     | 0.04                     |
| 370     | 0.57                     | 0.05                     | 0.55                     | 0.03                     |
| 373     | 0.53                     | 0.04                     | 0.63                     | 0.02                     |
| 391     | 0.66                     | 0.03                     | 0.67                     | 0.02                     |
| 392     | 0.55                     | 0.05                     | 0.57                     | 0.02                     |
| 407     | 0.55                     | 0.02                     | 0.57                     | 0.02                     |
| 409     | 0.55                     | 0.06                     | 0.58                     | 0.03                     |
| 414     | 0.53                     | 0.04                     | 0.67                     | 0.03                     |
| 436     | 0.63                     | 0.02                     | 0.66                     | 0.02                     |
| 439     | 0.55                     | 0.04                     | 0.54                     | 0.03                     |

| Residue | IgG1 Fc wt               |                          | IgG1 Fc T299A            |                          |
|---------|--------------------------|--------------------------|--------------------------|--------------------------|
|         | $R_2$ (s <sup>-1</sup> ) | error (s <sup>-1</sup> ) | $R_2$ (s <sup>-1</sup> ) | error (s <sup>-1</sup> ) |
| 274     | 47.1                     | 1.1                      | 48.1                     | 2.2                      |
| 278     | 46.6                     | 2.2                      | 51.6                     | 2.1                      |
| 288     | 49.9                     | 1.7                      | 45.4                     | 2.2                      |
| 290     | 49.7                     | 2.0                      | 40.7                     | 2.1                      |
| 300     | 52.2                     | 3.9                      | 75.0                     | 5.0                      |
| 317     | 54.9                     | 1.4                      | 52.4                     | 1.6                      |
| 319     | 57.8                     | 2.5                      | 50.2                     | 1.7                      |
| 320     | 54.6                     | 2.9                      | 52.1                     | 1.5                      |
| 322     | 57.3                     | 4.7                      | 51.8                     | 2.3                      |
| 349     | 60.6                     | 1.7                      | 55.3                     | 2.1                      |
| 360     | 51.0                     | 2.1                      | 50.5                     | 0.8                      |
| 370     | 61.0                     | 5.0                      | 57.0                     | 1.4                      |
| 373     | 56.7                     | 2.0                      | 47.7                     | 1.2                      |
| 391     | 52.4                     | 1.8                      | 52.2                     | 1.0                      |
| 392     | 58.5                     | 3.5                      | 56.1                     | 1.7                      |
| 407     | 54.7                     | 4.4                      | 53.0                     | 5.0                      |
| 409     | 64.7                     | 4.8                      | 63.0                     | 3.0                      |
| 414     | 58.0                     | 5.0                      | 57.0                     | 6.0                      |
| 436     | 57.2                     | 1.3                      | 54.4                     | 1.6                      |
| 439     | 56.0                     | 1.4                      | 51.6                     | 1.5                      |

**Supplemental Table 3.** Relative proportion of N-glycan species following expression of Fc variants in HEK293F cells. Observations deviated from < 1 Da from expected values. Isobaric ions were not distinguished. These data are related to Figure 5.

| Glycoform                                                                                       | Monoisotopic Mass + Na <sup>+</sup> (m/z) | Relative Abundance (%) |       |         |                 |                 |
|-------------------------------------------------------------------------------------------------|-------------------------------------------|------------------------|-------|---------|-----------------|-----------------|
|                                                                                                 |                                           | WT *                   | D265A | F243I * | F241I*<br>F243I | F241S*<br>F243S |
| M5N2           | 1579                                      |                        |       |         | 2.01            | 2.60            |
| NM3N2F         | 1591                                      |                        |       |         | 2.85            | 2.97            |
| G0F            | 1836                                      | 73.18                  | 10.0  | 18.41   | 8.63            | 10.42           |
| M7N2           | 1988                                      |                        |       |         | 0.83            | 1.68            |
| G1F            | 2040                                      | 23.85                  | 18.0  | 13.39   | 5.31            | 3.37            |
| G2             | 2070                                      |                        | 2.6   | 2.92    |                 |                 |
| N3M3N2F        | 2081                                      |                        |       | 6.26    | 2.93            | 4.04            |
| M8N2           | 2192                                      |                        |       |         | 1.49            |                 |
| Unidentified                                                                                    | 2232                                      |                        |       |         | 1.52            | 3.22            |
| G2F            | 2244                                      | 2.98                   | 31.5  | 10.16   | 6.47            | 4.14            |
| G1N3M3N2F      | 2285                                      |                        | 9.0   | 12.15   | 5.18            | 2.97            |
| A1G1F          | 2404                                      |                        |       |         | 3.57            | 3.22            |
| G2F2           | 2418                                      |                        | 4.0   | 5.21    | 2.46            | 2.89            |
| A1G2N3M3N      | 2432                                      |                        |       |         | 1.04            | 1.74            |
| G2N3M3N2F     | 2489                                      |                        | 4.4   | 4.03    | 3.87            | 2.89            |
| A1G1N1M5N2F  | 2564                                      |                        | 2.0   |         | 1.00            | 3.64            |
| A1G2F        | 2605                                      |                        | 7.0   | 9.96    | 11.35           | 5.76            |
| A1G3N3M3N    | 2636                                      |                        |       |         | 2.50            | 2.52            |
| A1G1N3M3N2F  | 2646                                      |                        | 2.0   |         | 2.80            | 2.85            |
| G2N3M3N2F2   | 2663                                      |                        |       | 2.6     | 1.43            | 1.67            |
| G3N3M3N2F    | 2693                                      |                        | 2.5   |         | 2.77            | 2.11            |
| A1G2F2       | 2780                                      |                        | 2.0   | 4.21    | 3.45            | 4.83            |
| A2G2         | 2793                                      |                        | 2.0   |         | 1.44            | 3.01            |
| A1G2N3M3N2F  | 2851                                      |                        |       | 3.21    | 2.63            | 3.38            |
| A2G2F        | 2967                                      |                        | 3.0   | 7.49    | 9.23            | 11.10           |
| A2G3N3M3N    | 2997                                      |                        |       |         | 2.29            | 3.53            |
| A2G2N3M3N2   | 3038                                      |                        |       |         | 2.55            | 2.46            |
| A1G3N3M3N2F  | 3055                                      |                        |       |         | 2.99            | 2.49            |
| A2G2N3M3N2F  | 3212                                      |                        |       |         | 1.46            |                 |
| A2G3N3M3N2F  | 3416                                      |                        |       |         | 2.50            | 2.57            |
| A3G3N3M3N2F  | 3777                                      |                        |       |         | 1.45            | 1.94            |

\* - values reported in Subedi, Hanson and Barb (2014)

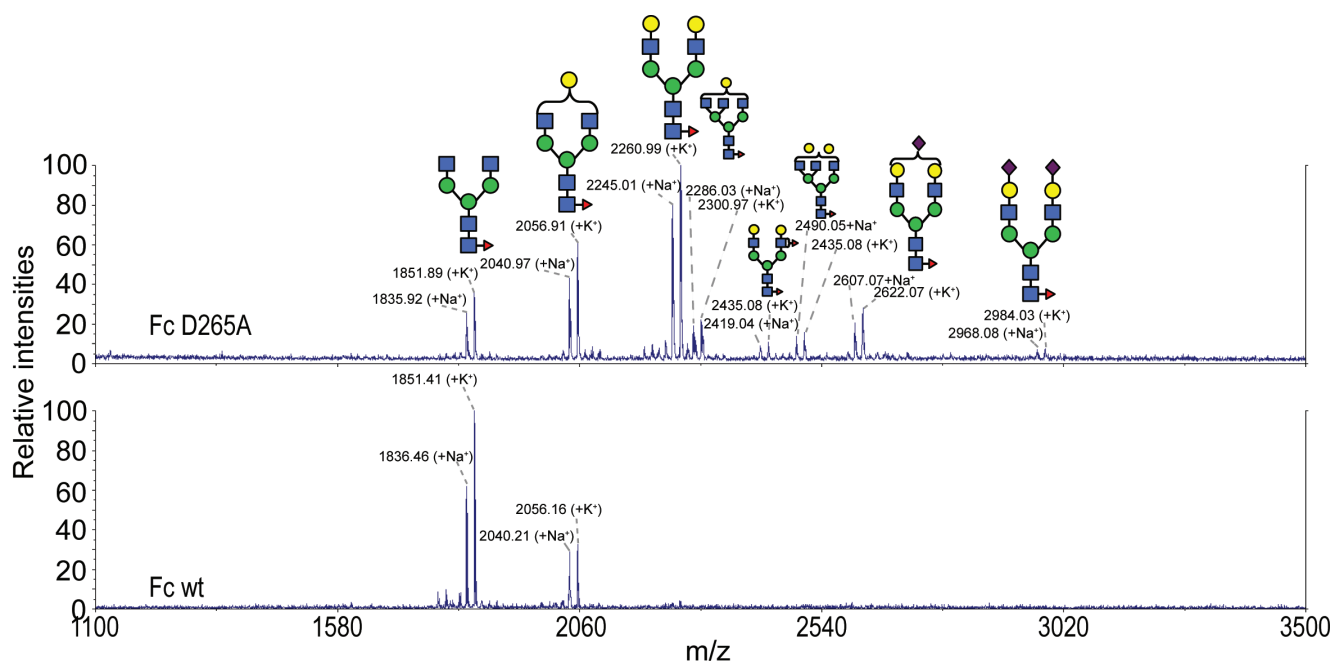

**Supplemental Figure 1.** N-glycans from IgG1 Fc D265A (*top panel*) experience a greater degree of modification during protein expression and show more glycoforms than those observed on IgG1 Fc WT (*bottom panel*). MALDI-MS analysis is conducted using PNGaseF-released and permethylated N-glycans. Cartoon diagrams represent a potential configuration based upon the observed mass and reflect the CfG convention (Varki, 2009). Isobaric ions were not distinguished and peaks corresponding to Na<sup>+</sup> and K<sup>+</sup> adducts were observed. Observed m/z values are indicated. These data are related to Figure 5.

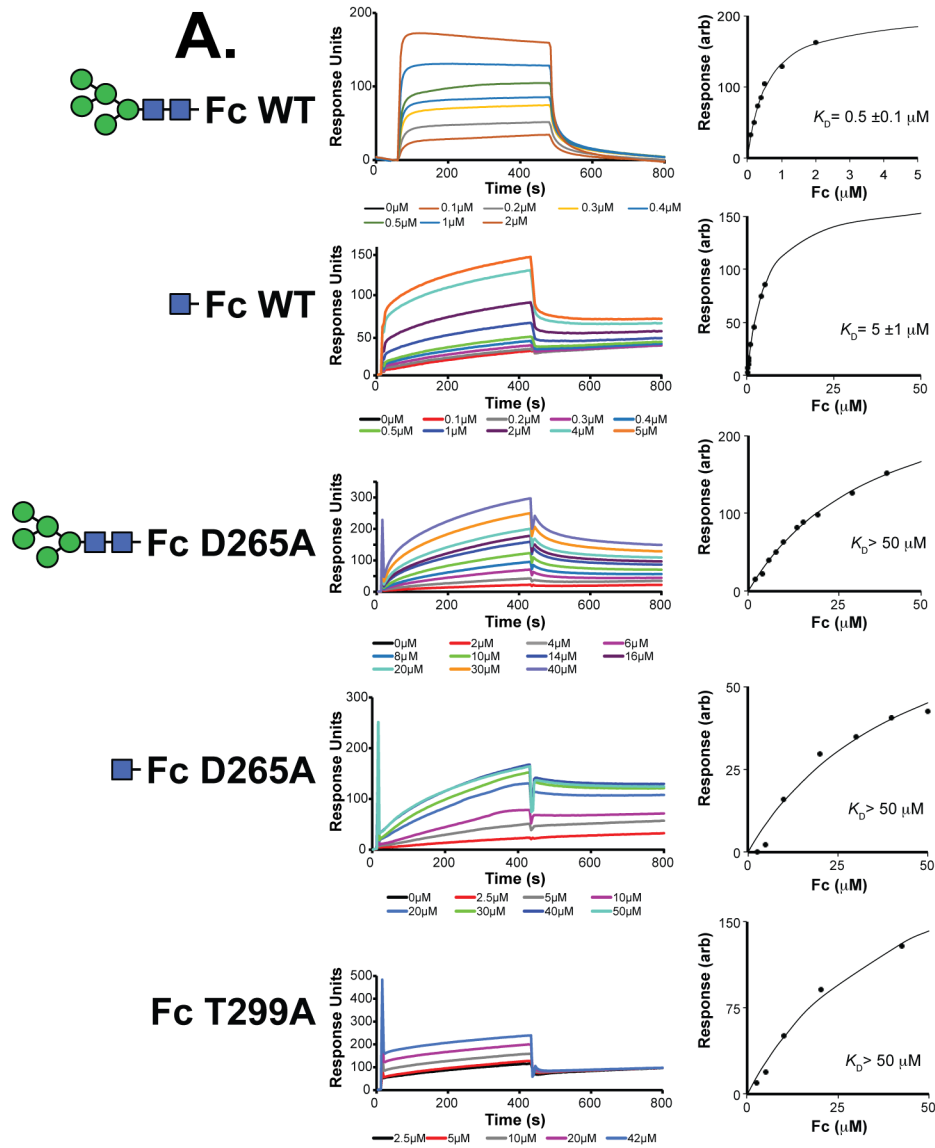

**Supplemental Figure 2.** SPR analysis of IgG1 Fc binding to Fc $\gamma$ RIIIa. **(A)** Interferograms from the SPR experiment are shown in the left column. In the right column, extracted changes in intensities are plotted and fitted  $K_D$  values are indicated. To prepare the plots in the right column, the effect of instrument drift was removed using baseline subtraction (most notable in the second, fourth and fifth interferograms from the top). Values for the top two  $K_D$ s are similar to our previously published results (Subedi et al., 2014). All response curves fit to maximum values of  $\sim 200$  units. Clear evidence of saturation was not observed for the third, fourth and fifth samples (from the top) due to limiting concentrations, therefore  $K_D$  values are given as a lower bound for these weak-binding species. The  $K_D$  values are reported in Figure 5A.

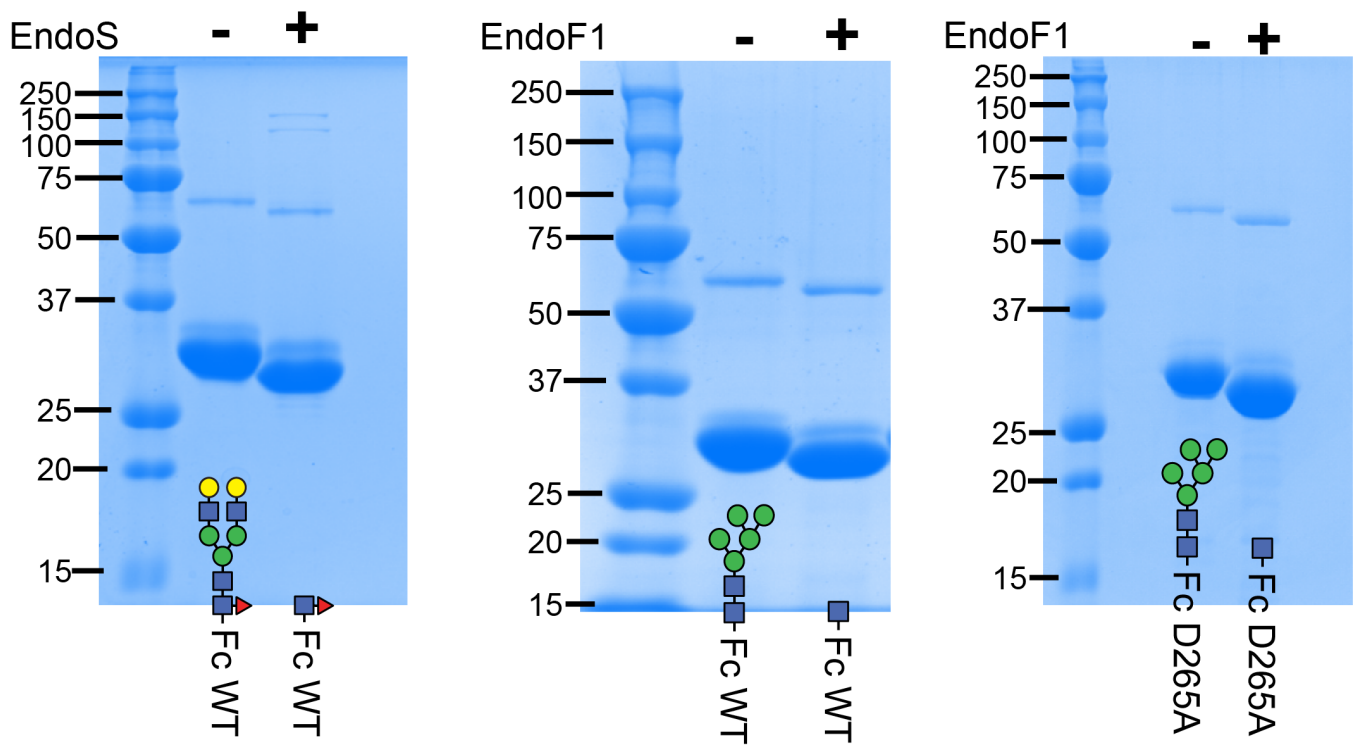

**Supplemental Figure 3.** Endoglycosidase S and F1 reactions resulted in complete conversion based on an SDS-PAGE analysis of reaction material before (-) and after (+) treatment. These data are related to Fc glycoforms presented in Figure 5 and 6.

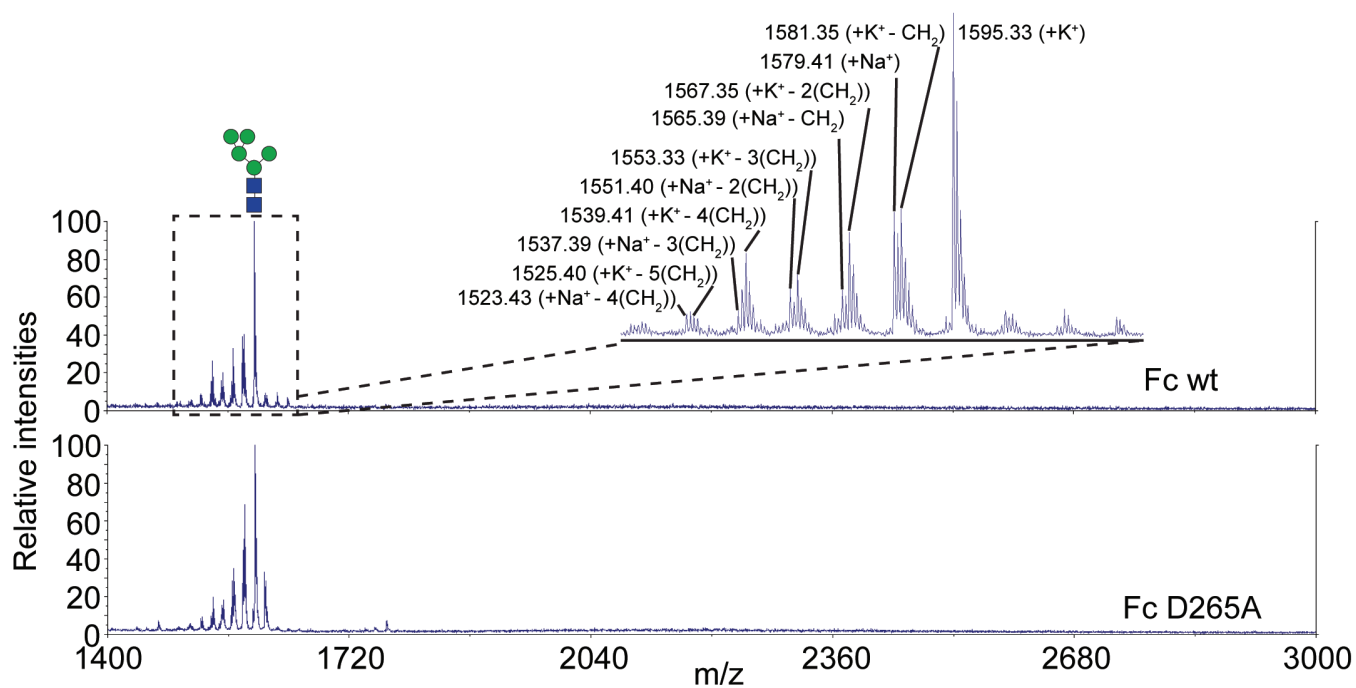

**Supplemental Figure 4.** N-glycans from IgG1 Fc WT (*top* panel) and IgG1 Fc D265A (*bottom* panel) were predominantly of a Man5 type following protein expression using the HEK293S *lec1*<sup>-/-</sup> cell line (Reeves et al., 2002) as judged by MALDI-MS analysis of PNGaseF-released and permethylated N-glycans. Cartoon diagrams reflect the CfG convention (Varki, 2009). Isobaric ions were not distinguished and peaks corresponding to Na<sup>+</sup> and K<sup>+</sup> adducts were observed. Observed m/z values are indicated. These data are related to Fc glycoforms presented in Figure 5.



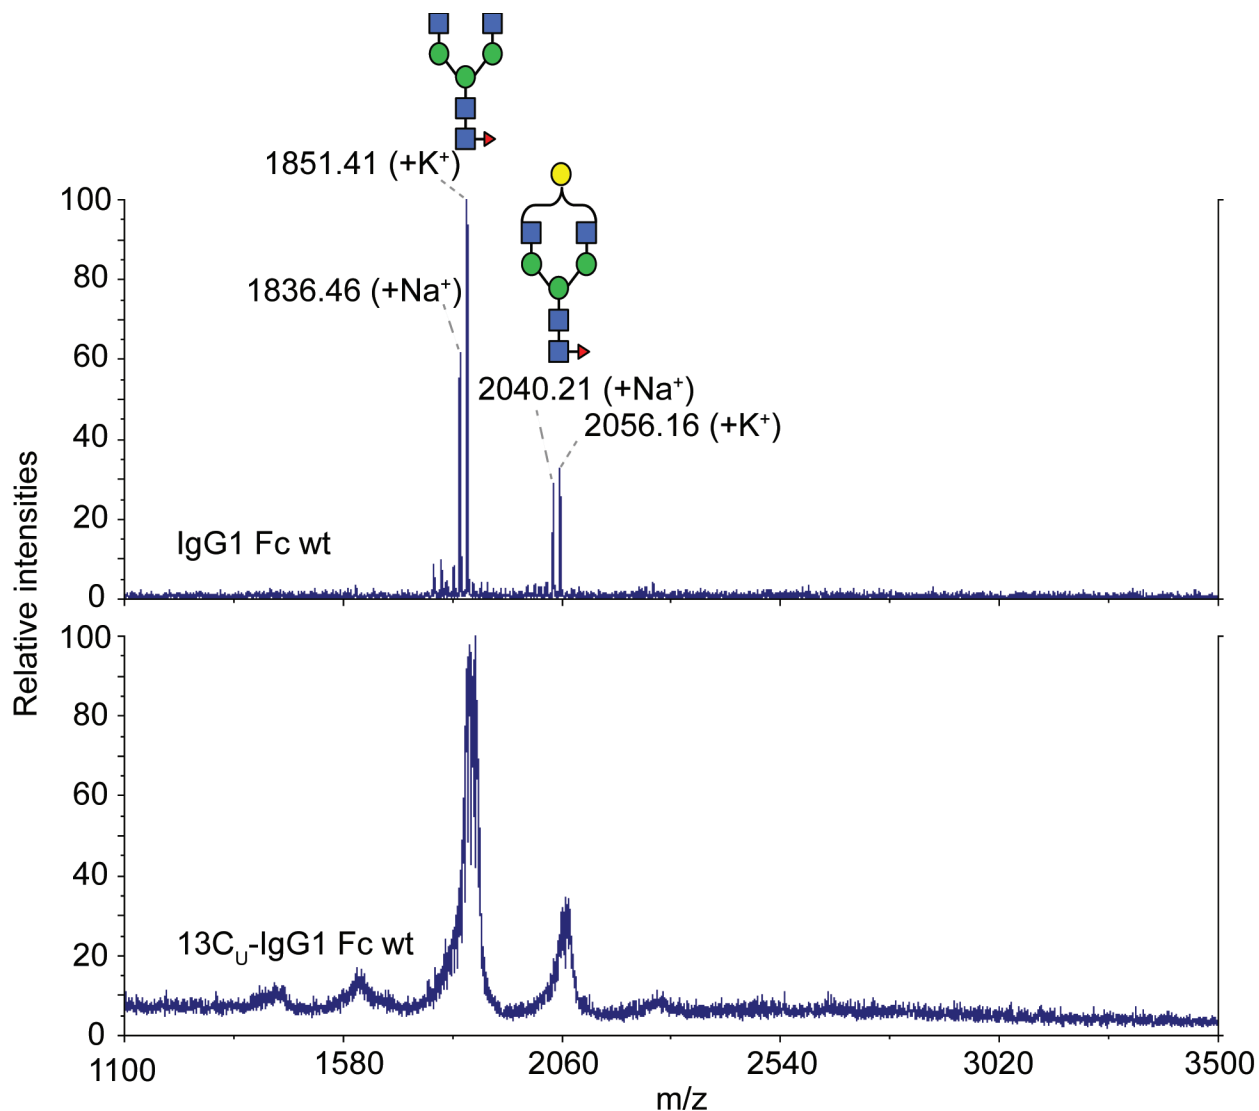

**Supplement Figure 5.** N-glycans from IgG1 Fc expressed in normal medium (*top* panel) or medium enriched with <sup>13</sup>C(1,2,3,4,5,6)-glucose (*bottom* panel) show similar distributions following MALDI-MS analysis of PNGaseF-released and permethylated N-glycans. Cartoon diagrams represent a potential configuration based upon the observed mass and reflect the CfG convention (Varki, 2009). Isobaric ions were not distinguished and peaks corresponding to Na<sup>+</sup> and K<sup>+</sup> adducts were observed. Observed m/z values are indicated. These data are related to Figure 6.

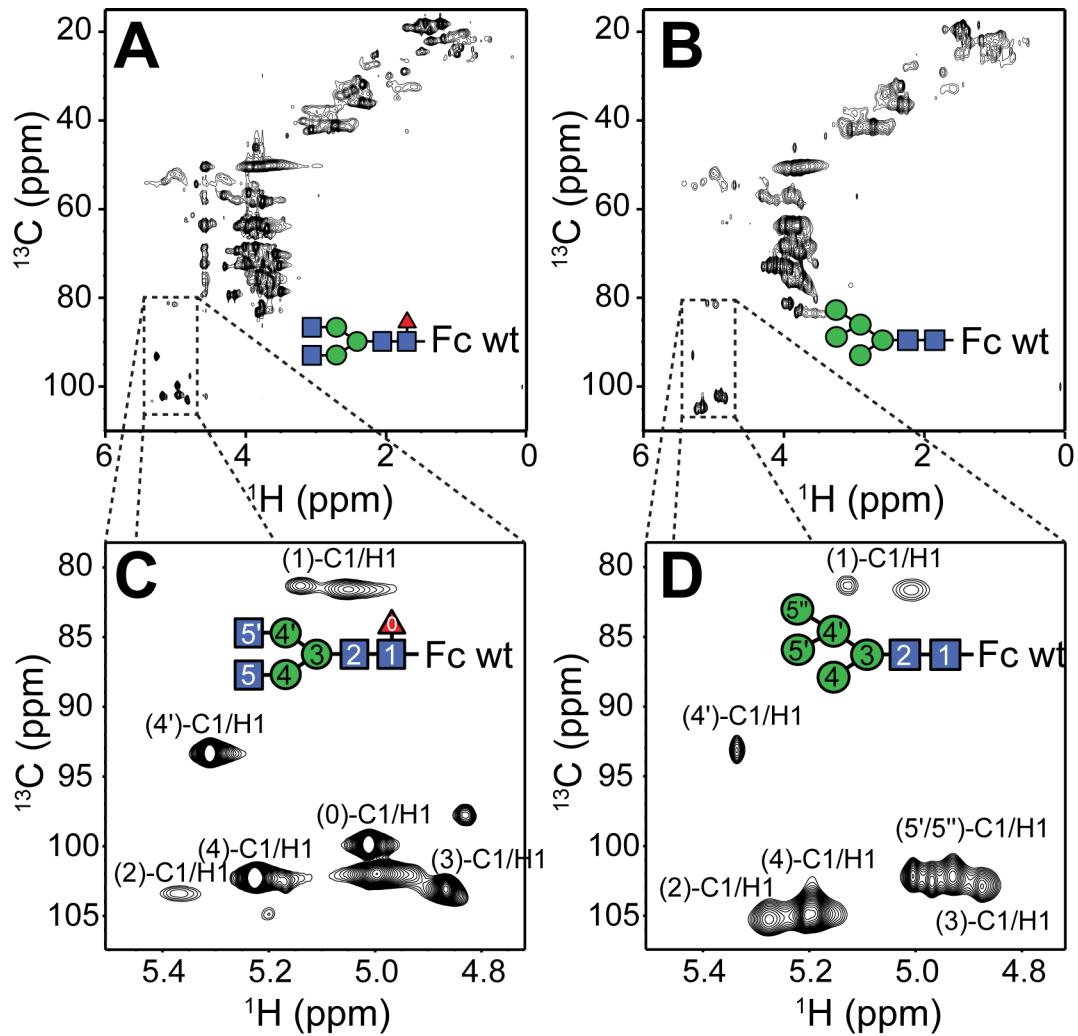

**Supplement Figure 6.**  $^1\text{H}$ - $^{13}\text{C}$  HSQC spectra of purified Fc, expressed in the presence of  $^{13}\text{C}(1,2,3,4,5,6)$ -glucose, indicate that a significant proportion of the  $^{13}\text{C}$  nuclei are found in the N-glycan. (A) Fc wt expressed in the HEK293F cell line. (B) Fc wt expressed in the HEK293S *lec1*<sup>-/-</sup> cell line. (C) and (D) show the spectral region corresponding to anomeric resonances of (A) and (B), respectively. Partial assignments are available from previous reports (Vliegthart et al., 1983; Yamaguchi, 2008; Yamaguchi and Kato, 2006). These data are related to Figure 6.

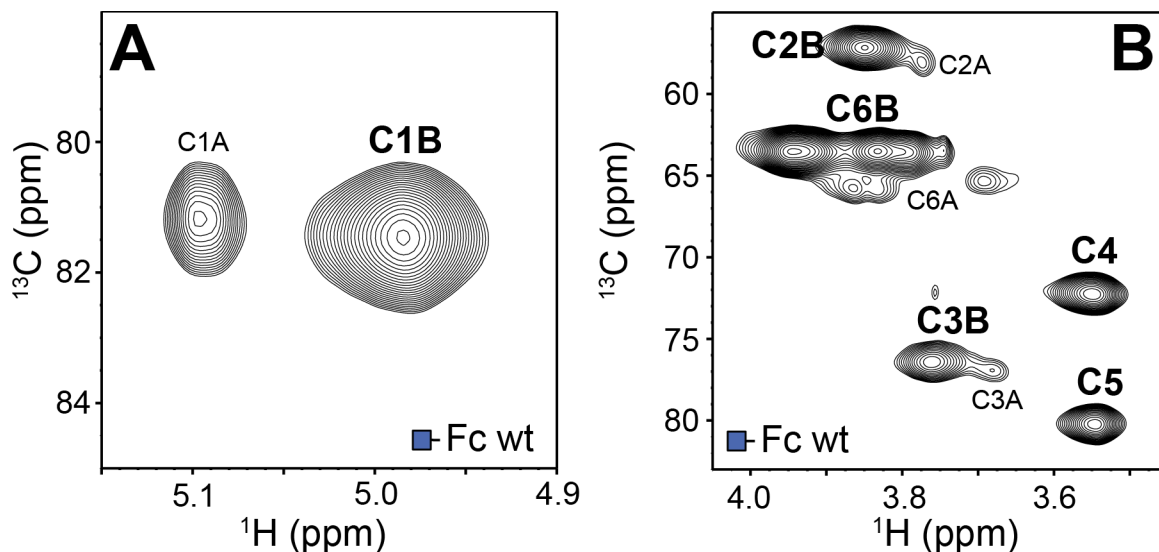

**Supplemental Figure 7.**  $^1\text{H}$ - $^{13}\text{C}$  HSQC spectra of Fc, grown in the presence of  $^{13}\text{C}$ (1,2,3,4,5,6)-glucose using the HEK293S *lec1<sup>-/-</sup>* cell line and treated with Endo F1 to remove all glycan residues except (1)GlcNAc, reveal a weaker, duplicate set of peaks for the (1)GlcNAc residue in the anomeric region (A) or for resonances at the 2-6 positions (B). The strongest signals are labeled “C#B” and the weaker signals “C#A.” These data are related to Figure 6.

### Supplemental References

- Reeves, P.J., Callewaert, N., Contreras, R., and Khorana, H.G. (2002). Structure and function in rhodopsin: high-level expression of rhodopsin with restricted and homogeneous N-glycosylation by a tetracycline-inducible N-acetylglucosaminyltransferase I-negative HEK293S stable mammalian cell line. *Proceedings of the National Academy of Sciences of the United States of America* 99, 13419-13424.
- Subedi, G.P., Hanson, Q.M., and Barb, A.W. (2014). Restricted motion of the conserved immunoglobulin G1 N-glycan is essential for efficient Fcγ3 binding. *Structure* 22, 1478-1488.
- Varki, A. (2009). *Essentials of glycobiology*, 2nd edn (Cold Spring Harbor, N.Y.: Cold Spring Harbor Laboratory Press).
- Vliegthart, J.F.G., Dorland, L., and van Halbeek, H. (1983). High-resolution,  $^1\text{H}$ -nuclear magnetic resonance spectroscopy as a tool in the structural analysis of carbohydrates related to glycoproteins. *Adv Carbohydr Chem Biochem* 41, 209-374.
- Yamaguchi, Y. (2008). Development and applications of stable-isotope-labeling methods oriented to structural glycobiology. *Trends Glycosci Glyc* 20, 117-130.
- Yamaguchi, Y., and Kato, K. (2006). Structural Glycobiology by Stable-isotope-assisted NMR Spectroscopy. *Modern Magnetic Resonance*, 223-229.
